# Supplementary material for: Kinematic Plasticity during Flight in Fruit Bats: Individual Variability in Response to Loading
Source: PubMed Central journal article supplement (PMC3352941; doi:10.1371/journal.pone.0036665), 2012-05-15
Supplement: pone.0036665.s001.pdf [file pone.0036665.s001.pdf]

**Table S1. Summary of ANCOVA analyses of kinematic variables in response to loading and speed.**

| Variable                    | Bat1                |                    |                        | Bat2   |                       |                        | Bat3   |                 |                       |
|-----------------------------|---------------------|--------------------|------------------------|--------|-----------------------|------------------------|--------|-----------------|-----------------------|
|                             | effect <sup>1</sup> | slope <sup>2</sup> | elevation <sup>3</sup> | effect | slope                 | elevation              | effect | slope           | elevation             |
| Frequency (Hz)              | ↑                   | $F_{1,19}=3.07$    | $F_{1,19}=14.17^{**}$  | ↓      | $F_{1,23}=22.4^{***}$ | TQT <sup>***</sup>     | ↑      | $F_{1,28}=1.81$ | $F_{1,28}=19.8^{***}$ |
| Amplitude (deg)             | ↓                   | $F_{1,19}=0.21$    | $F_{1,19}=14.1^{**}$   | ↓      | $F_{1,21}=11.4^{**}$  | TQT <sup>*</sup>       |        | $F_{1,26}=2.80$ | $F_{1,26}=3.55$       |
| Stroke plane angle (deg)    |                     | $F_{1,20}=0.005$   | $F_{1,20}=0.70$        |        | $F_{1,23}=0.009$      | $F_{1,23}=0.49$        | ↓      | $F_{1,31}=0.31$ | $F_{1,31}=10.8^{**}$  |
| Camber (m <sup>-1</sup> )   | ↑                   | $F_{1,7}=2.14$     | $F_{1,7}=11.7^{*}$     | ↑      | $F_{1,11}=2.92$       | $F_{1,11}=90.3^{***}$  |        | $F_{1,13}=0.53$ | $F_{1,13}=0.14$       |
| Proximal AoA (deg)          |                     | $F_{1,6}=4.2$      | $F_{1,6}=0.82$         |        | $F_{1,14}=0.0007$     | $F_{1,14}=4.10$        |        | $F_{1,13}=1.60$ | $F_{1,13}=3.61$       |
| Proximal AoA (deg)          |                     | $F_{1,6}=5.06$     | $F_{1,6}=0.21$         |        | $F_{1,14}=0.004$      | $F_{1,14}=0.64$        |        | $F_{1,13}=0.37$ | $F_{1,13}=3.44$       |
| Elbow extension (deg)       | ↑                   | $F_{1,6}=0.37$     | $F_{1,6}=222.4^{***}$  | ↑      | $F_{1,12}=2.42$       | $F_{1,12}=115.5^{***}$ | ↑      | $F_{1,12}=0.04$ | $F_{1,12}=15.8^{**}$  |
| Wrist extension (deg)       | ↑                   | $F_{1,6}=0.69$     | $F_{1,6}=26.1^{**}$    | ↑      | $F_{1,12}=5.70^{*}$   | TQT <sup>*</sup>       | ↑      | $F_{1,12}=0.36$ | $F_{1,12}=24.0^{***}$ |
| Wing area (m <sup>2</sup> ) |                     | $F_{1,7}=2.66$     | $F_{1,7}=3.08$         | ↑      | $F_{1,12}=0.63$       | $F_{1,12}=294.6^{***}$ |        | $F_{1,13}=0.72$ | $F_{1,13}=4.04$       |
| $C_v$                       |                     |                    | TQT                    | ↑      |                       | TQT <sup>*</sup>       |        |                 | TQT                   |

<sup>1</sup>Effect represents the positive (↑) or negative (↓) change of a variable in response to loading.

<sup>2</sup>The equality of slope was determined by the interaction effect of 'loading' and 'speed' effects in an ANCOVA analysis.

<sup>3</sup>The elevation effect reflects the effect of the loading treatment over a variable and it was determined by ANCOVA analysis. If the slopes were different between unloaded and loaded treatments, significance was tested by a Tsutakawa's Quick test (TQT).

Statistical significance: \* $P < 0.05$ , \*\* $P < 0.01$ , \*\*\* $P < 0.001$
